# Supplementary material for: Detection of postoperative plasma circulating tumour DNA and lack of CDX2 expression as markers of recurrence in patients with localised colon cancer
Source: PubMed Central journal article supplement — ESMO Open. 2020 Sep 23;5(5):e000847. doi: 10.1136/esmoopen-2020-000847 (PMC7513635; doi:10.1136/esmoopen-2020-000847), 2020-09-23
Supplement: esmoopen-2020-000847supp001.pdf [file esmoopen-2020-000847supp001.pdf]

Supplementary table 1. Patient characteristics

| Characteristics                         |                               | All Patients<br>150 (%) | Plasma analysis<br>94 (%) |
|-----------------------------------------|-------------------------------|-------------------------|---------------------------|
| Age, median (range)                     | 71 (41-93)                    | 150 (100)               | 94 (100)                  |
| Gender                                  | Male                          | 94 (62.7)               | 61 (64.9)                 |
|                                         | Female                        | 56 (37.3)               | 33 (35.1)                 |
| Tumor side                              | Left                          | 85 (56.7)               | 45 (47.9)                 |
|                                         | Right                         | 65 (43.3)               | 49 (52.1)                 |
| Grading                                 | Well-differentiated           | 137 (93.2)              | 88 (93.6)                 |
|                                         | Poorly-differentiated         | 10 (6.8)                | 6 (6.4)                   |
| Stage                                   | I                             | 29 (19.3)               | 14(14.9)                  |
|                                         | II                            | 66 (44)                 | 41(43.6)                  |
|                                         | III                           | 54 (36)                 | 39(41.5)                  |
| Lymphovascular invasion                 | Yes                           | 38 (25.9)               | 31 (32.97)                |
|                                         | No                            | 109 (74.1)              | 62 (67.02)                |
| Perineural invasion                     | Yes                           | 30 (20.4)               | 22(23.5)                  |
|                                         | No                            | 117 (79.6)              | 71(75.5)                  |
| CEA level at baseline (ng/mL)           | 3.5                           | 83 (56.5)               | 51(54.2)                  |
|                                         | > 3,5                         | 64 (43.5)               | 42(44.7)                  |
|                                         | Unknown                       |                         | 1 (1.1)                   |
| MMR status                              | Proficient                    | 133 (89.4)              | 84 (89.4)                 |
|                                         | Deficient                     | 16 (10.6)               | 10 (10.6)                 |
| Clinicopathologic risk group (Stage II) | Low                           | 38 (58.5)               | 22(53.6)                  |
|                                         | High                          | 27 (41.5)               | 19(46.4)                  |
| Adjuvant Chemotherapy                   | Single-agent fluoropyrimidine | 34 (22.5)               | 23 (24.5%)                |
|                                         | Oxaliplatin-based regimen     | 21 (13.9)               | 12 (12.8%)                |
|                                         | No                            | 96 (63.6)               | 59 (62.8)                 |

Key words: consensus molecular subtypes, CDX2 homeoprotein, colon cancer, interleukin-6, plasma circulating-tumor DNA
