# Supplementary figures and images for: Detection of postoperative plasma circulating tumour DNA and lack of CDX2 expression as markers of recurrence in patients with localised colon cancer
Source: PubMed Central journal article supplement — ESMO Open. 2020 Sep 23;5(5):e000847. doi: 10.1136/esmoopen-2020-000847 (PMC7513635; doi:10.1136/esmoopen-2020-000847), 2020-09-23

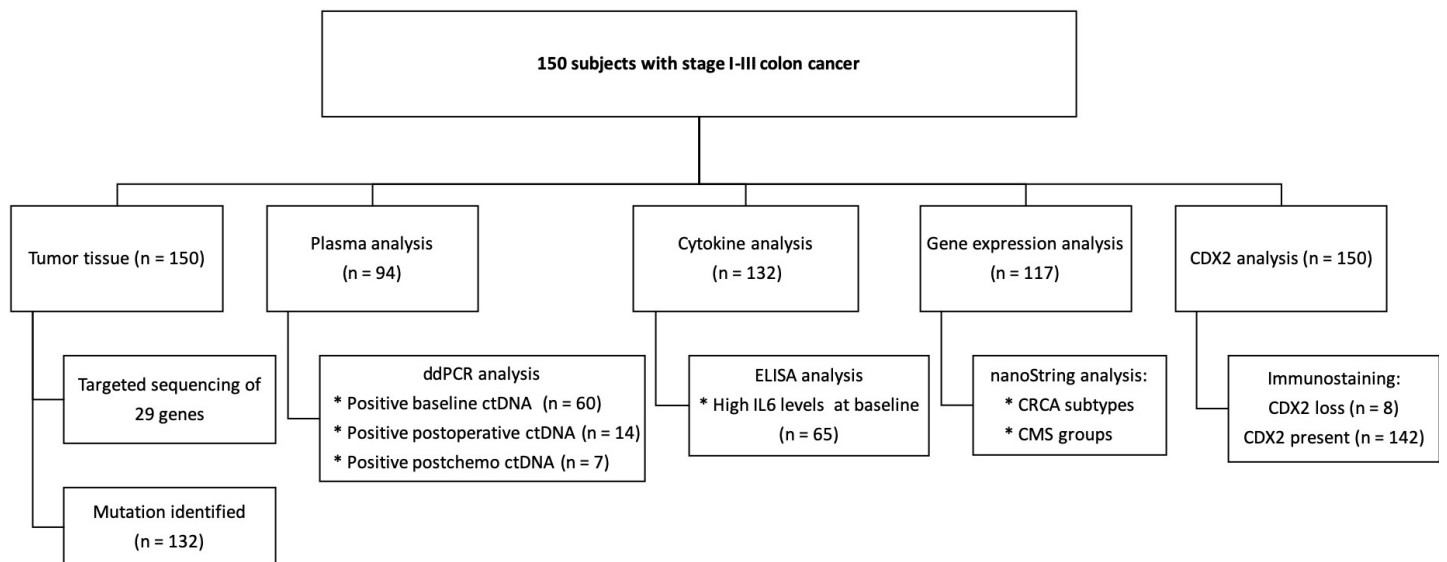

Supplement: esmoopen-2020-000847supp002.pdf [file esmoopen-2020-000847supp002.pdf]

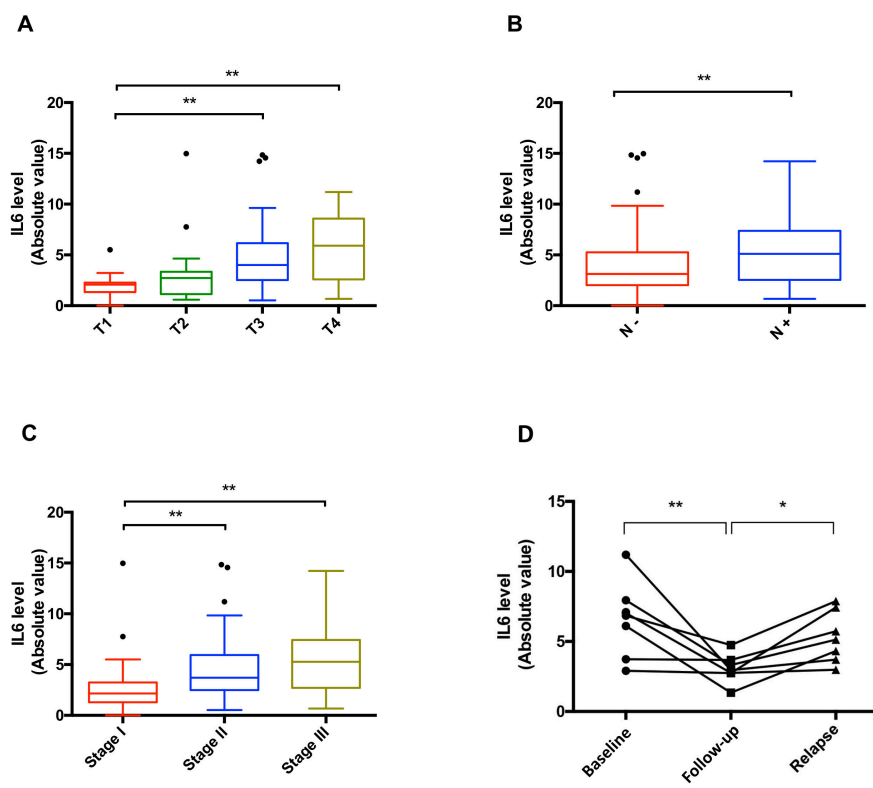

Supplement: esmoopen-2020-000847supp003.pdf [file esmoopen-2020-000847supp003.pdf]

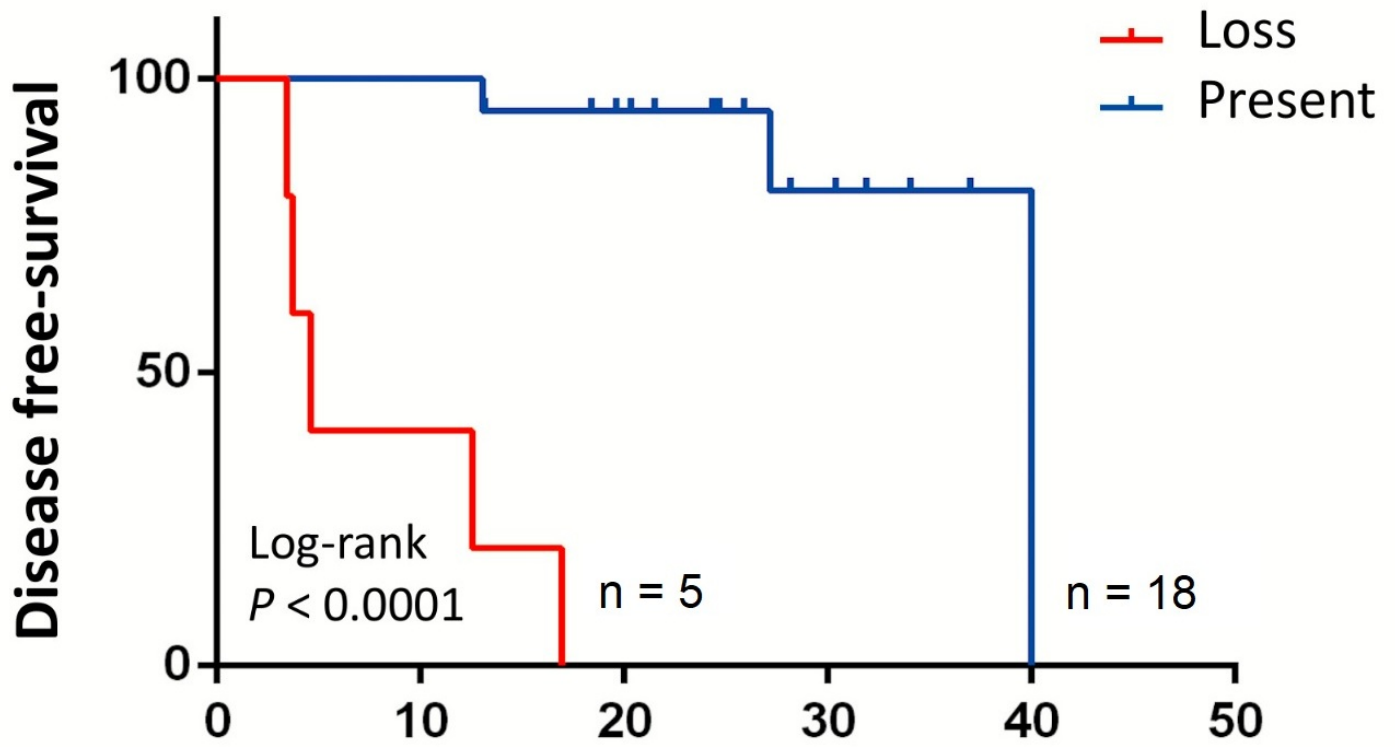

Supplement: esmoopen-2020-000847supp004.pdf [file esmoopen-2020-000847supp004.pdf]
